# Supplementary material
Source: PubMed Central journal article supplement (PMC5558442)

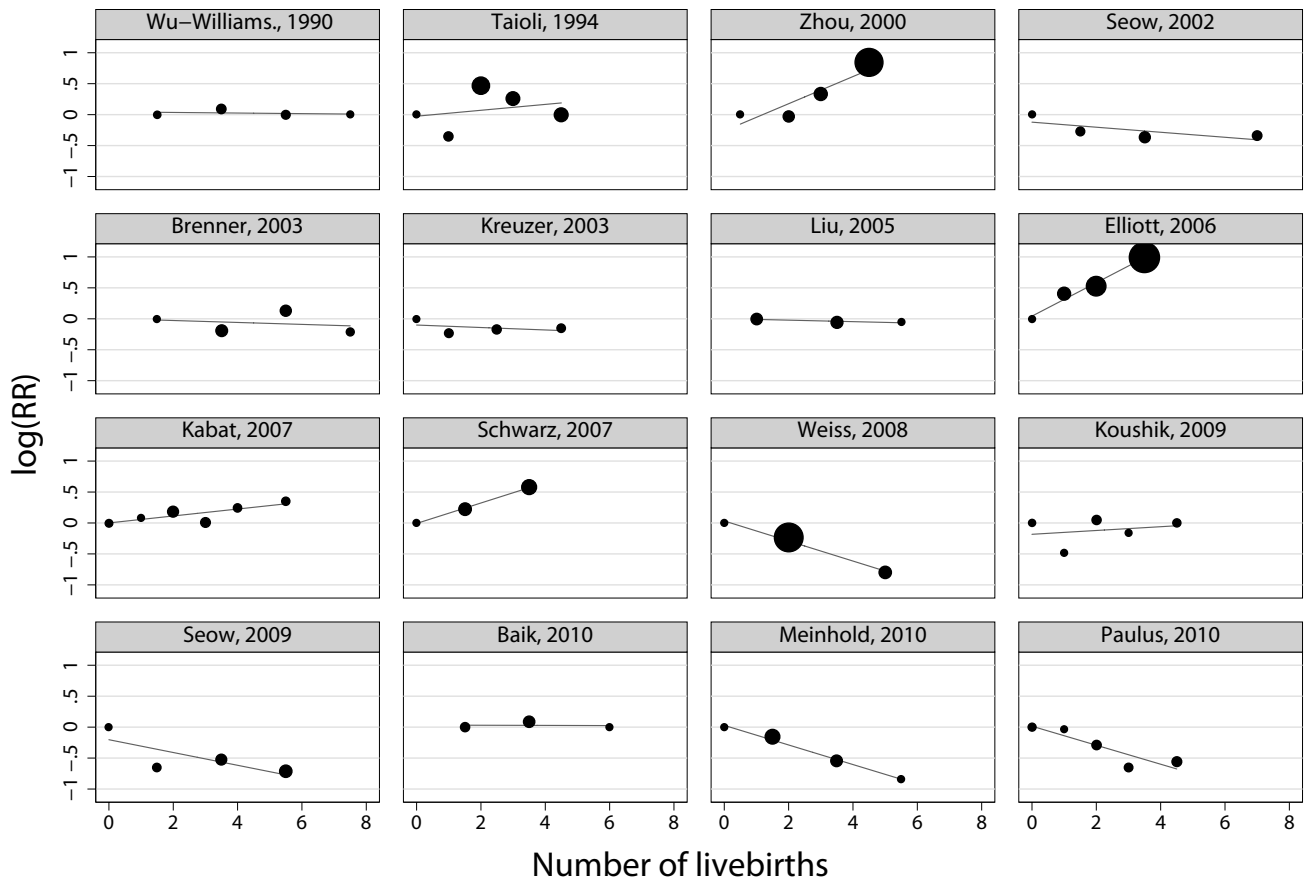

Supplement: NIHMS344308-supplement-03.pdf [file NIHMS344308-supplement-03.pdf]
